# Supplementary material for: Screening of highly charged ions in an ionic liquid; when will ion pairs form?
Source: Royal Society of Chemistry journal article supplement (doi:10.1039/d0cp01228a), 2020-01-01
Supplement: d0cp01228a1.pdf [file d0cp01228a1.pdf]

**ELECTRONIC SUPPLEMENTARY INFORMATION FOR ‘SCREENING  
OF HIGHLY CHARGED IONS IN AN IONIC LIQUID; WHEN WILL  
ION PAIRS FORM?’ BY R.M.LYNDEN-BELL**

1. CALCULATION OF UNCERTAINTIES IN THE FREE ENERGY CURVE.

The free energy curve is calculated from the observed curve of the force by equation (1) in the paper.:

$$(1) \quad A(z) - A(z') = - \int_{z'}^z (\Delta F(z)/2) dz.$$

The mean force,  $\Delta F(z)$ , is found for simulations at a number of fixed values of  $z$ . The integration is carried out using the Trapezium rule

$$(2) \quad A(z_n) - A(z_0) = - \sum_1^n (\Delta F_i - \Delta F_{i-1})(z_i - z_{i-1})/4$$

where one factor of one half comes from the rule and another factor from the definition of  $A$ .

To obtain the uncertainty one needs the variance of this quantity, knowing the variance  $\sigma_i^2$  in the measurement of each average force  $\Delta F_i$ . If we assume that the variances of the forces at different separations are uncorrelated (a good assumption in my opinion) and that the forces have normal distributions (a less good assumption that we shall discuss further) then the variance of the sum of forces from  $z=0$  to  $z=n$  is

$$(3) \quad S_n^2 = \sigma_0^2 \delta_{01}^2 / 4 + \sum_{i=1}^{n-1} \sigma_i^2 (\delta_{i-1,i+1} / 2)^2 + \sigma_n^2 \delta_{n-1,n}^2 / 4$$

where  $\delta_{IJ} = z_i - z_j$ .

The standard error of each point in the free energy curve is then the square root of the variance of that point.

The variance of the forces were estimated from the results of several nanosecond runs.

The difficulty with this method is that the total run length at each may not be enough to estimate the variance accurately. In section 3.4 of the paper we have shown that for separations around 4Å the system has two solvation states with different numbers of anions. In these cases the variance is estimated from the differences between states.

## 2. FORCE FIELD PARAMETERS

FIELD file in DL\\_Poly format

```

\  

[dmim]Cl with CD solute  

UNITS kJ  
  

molecules 3  

Imidazolium  

nummols 192  

atoms 16  

N      14.0      -0.267      2      0      1  

C1     12.0      0.407      1      0      1  

C2     12.0      0.105      2      0      1  

C4     12.0      0.124      2      0      1  

H1      1.0      0.097      1      0      1  

H2      1.0      0.094      2      0      1  

H4      1.0      0.064      6      0      1  

constraints 6  

  6  11  1.085  

  6  12  1.085  

  6  13  1.085  

  7  14  1.085  

  7  15  1.085  

  7  16  1.085  

angles 12  

harm  2  7  14  293.00000 109.470000000  

harm  2  7  15  293.00000 109.470000000  

harm  2  7  16  293.00000 109.470000000  

harm 14  7  15  293.00000 109.470000000  

harm 14  7  16  293.00000 109.470000000  

harm 15  7  16  293.00000 109.470000000  

harm  1  6  11  293.00000 109.470000000  

harm  1  6  12  293.00000 109.470000000  

harm  1  6  13  293.00000 109.470000000  

harm 11  6  12  293.00000 109.470000000  

harm 11  6  13  293.00000 109.470000000  

harm 12  6  13  293.00000 109.470000000  

rigid 1  

  10  1  2  3  4  5  6  7  8  9  10  

finish  

chloride

```

## ELECTRONIC SUPPLEMENTARY INFORMATION FOR 'SCREENING OF HIGHLY CHARGED IONS IN AN IONIC LIQUID; WHEN W

nummols 192

atoms 1

|    |      |      |   |   |   |
|----|------|------|---|---|---|
| Cl | 37.0 | -1.0 | 1 | 0 | 1 |
|----|------|------|---|---|---|

finish

CD

nummols 1

atoms 2

|   |        |      |   |
|---|--------|------|---|
| C | 2000.0 | 2.0  | 0 |
| D | 2000.0 | -2.0 | 0 |

finish

vdw 52

|    |         |         |          |        |
|----|---------|---------|----------|--------|
| C1 | C1 buck | 369737. | 0.277778 | 2439.8 |
| C1 | C2 buck | 369737. | 0.277778 | 2439.8 |
| C1 | C4 buck | 369737. | 0.277778 | 2439.8 |
| C1 | N buck  | 369743. | 0.271003 | 1833.2 |
| C1 | H1 buck | 66529.0 | 0.272480 | 576.9  |
| C1 | H2 buck | 66529.0 | 0.272480 | 576.9  |
| C1 | H4 buck | 66529.0 | 0.272480 | 576.9  |
| C2 | C2 buck | 369743. | 0.277778 | 2439.8 |
| C2 | C4 buck | 369743. | 0.277778 | 2439.8 |
| C2 | N buck  | 369743. | 0.271003 | 1833.2 |
| C2 | H1 buck | 66529.0 | 0.272480 | 576.9  |
| C2 | H2 buck | 66529.0 | 0.272480 | 576.9  |
| C2 | H4 buck | 66529.0 | 0.272480 | 576.9  |
| C4 | C4 buck | 369743. | 0.277778 | 2439.8 |
| C4 | N buck  | 369743. | 0.271003 | 1833.2 |
| C4 | H1 buck | 66529.0 | 0.272480 | 576.9  |
| C4 | H2 buck | 66529.0 | 0.272480 | 576.9  |
| C4 | H4 buck | 66529.0 | 0.272480 | 576.9  |
| N  | N buck  | 254525. | 0.264550 | 1378.4 |
| N  | H1 buck | 55198.0 | 0.265957 | 433.6  |
| N  | H2 buck | 55198.0 | 0.265957 | 433.6  |
| N  | H4 buck | 55198.0 | 0.265957 | 433.6  |
| H1 | H1 buck | 11971.0 | 0.267380 | 136.4  |
| H1 | H2 buck | 11971.0 | 0.267380 | 136.4  |
| H1 | H4 buck | 11971.0 | 0.267380 | 136.4  |
| H2 | H2 buck | 11971.0 | 0.267380 | 136.4  |
| H2 | H4 buck | 11971.0 | 0.267380 | 136.4  |
| H4 | H4 buck | 11971.0 | 0.267380 | 136.4  |
| Cl | Cl buck | 924640. | 0.284900 | 7740.2 |
| Cl | C1 buck | 584700. | 0.281294 | 4345.6 |
| Cl | C2 buck | 584700. | 0.281294 | 4345.6 |
| Cl | C4 buck | 584700. | 0.281294 | 4345.6 |

ELECTRONIC SUPPLEMENTARY INFORMATION FOR 'SCREENING OF HIGHLY CHARGED IONS IN AN IONIC LIQUID';

|    |    |      |         |          |        |
|----|----|------|---------|----------|--------|
| C1 | N  | buck | 485123. | 0.274348 | 3266.3 |
| C1 | H1 | buck | 105208. | 0.275862 | 1027.4 |
| C1 | H2 | buck | 105208. | 0.275862 | 1027.4 |
| C1 | H4 | buck | 105208. | 0.275862 | 1027.4 |
| C  | C1 | lj   | 1.009   | 3.49     |        |
| C  | C1 | lj   | 0.664   | 3.56     |        |
| C  | C2 | lj   | 0.664   | 3.56     |        |
| C  | C4 | lj   | 0.7488  | 3.565    |        |
| C  | N  | lj   | 0.9335  | 3.49     |        |
| C  | H1 | lj   | 0.2773  | 3.07     |        |
| C  | H2 | lj   | 0.2773  | 3.07     |        |
| C  | H4 | lj   | 0.2837  | 3.12     |        |
| D  | C1 | lj   | 1.009   | 3.49     |        |
| D  | C1 | lj   | 0.664   | 3.56     |        |
| D  | C2 | lj   | 0.664   | 3.56     |        |
| D  | C4 | lj   | 0.7488  | 3.565    |        |
| D  | N  | lj   | 0.9335  | 3.49     |        |
| D  | H1 | lj   | 0.2773  | 3.07     |        |
| D  | H2 | lj   | 0.2773  | 3.07     |        |
| D  | H4 | lj   | 0.2837  | 3.07     |        |

close

\*\*\*\*\*
